1  
2  
3  
4  
5  
6  
7  
8  
9  
10  
11  
12  
13  
14  
15  
16  
17  
18  
19  
20  
21  
22  
23  
24  
25  
26  
27  
28  
29  
30  
31  
32  
33  
34  
35

A Comparison of Comorbidities and their Contribution to Medical Resource Utilization for Matched HIV-Infected and Uninfected Individuals: A Cross-Sectional Analysis

Comorbidities and Resource Utilization among HIV infected and uninfected patients

Michelle Odlum, Ed.D., M.P.H.<sup>1§\*</sup>, Sunmoo Yoon, R.N., Ph.D.<sup>1\*</sup>

<sup>1</sup>Columbia University Medical Center, New York, NY 10032

§Corresponding Author: Michelle Odlum

E-mail: [mlol2@columbia.edu](mailto:mlol2@columbia.edu)

\*These authors have contributed equally to this work.

## 36 Abstract

37

HIV long-term

38 uninfected groups. Aging with HIV involves complex interactions of factors (e.g., Individual  
39 Characteristics, Infections) that result in a 20% increase in comorbidity risk. With over half of  
40 the 1.1 million people living with HIV in the US age 50 and over, the need exists to further  
41 understand this interplay and differences in aging-related outcomes. Electronic health record data  
42 was analyzed for HIV infected (N=208) and uninfected (N=208) adult inpatients, propensity  
43 score matched by age and gender. Diagnostic codes were extracted that comprise the factors of  
44 Individual Characteristics, High Risk Behaviors, Chronic Conditions, Mental Health Conditions  
45 and Infections. Identified codes were assessed for their contributions to medical resource  
46 utilization, based on Charlson Comorbidity scores. Significant contributors to high Charlson  
47 scores for HIV infected patients were age ( $\beta=0.116$ ; [95% CI 0.077, 0.155]) and admission  
48 frequency ( $\beta=0.159$ ; [95% CI 0.114, 0.205]) in addition to the comorbidities of acute kidney  
49 failure ( $\beta=3.27$ ; [95% CI 1.76, 4.78]), hypertension ( $\beta=-1.77$ ; [95% CI -2.99, -0.551]).  
50 Significant contributors for HIV uninfected patients were age ( $\beta=0.110$ ; [95% CI 0.087, 0.133]),  
51 length of hospital stay ( $\beta=0.006$ ; [95% CI 0.003, 0.009]), acute kidney failure ( $\beta=1.556$ ; [95%  
52 CI 0.611, 2.50]), heart failure ( $\beta=1.713$ ; [95% CI 0.717, 2.71]), and diabetes mellitus II ( $\beta=$   
53 1.385; [95% CI 0.634, 2.14]). Our findings enhance the understanding of the contributions to  
54 medical resource utilization based on HIV status and can inform intervention efficacy for  
55 improved HIV aging outcomes.

56

57 **Keywords:** Charlson Scores, Comorbidities, Electronic Health Records, Medical Resource  
58 Utilization

59

60

61

62

63

## 64 Introduction

65           There is a growing US population of aging persons living with HIV/AIDS (PLWH)  
66 because of diagnosis in later life or long-term survivorship [1,2]. Immune restoration with  
67 highly active antiretroviral therapy (HAART) [1,3] has contributed tremendously to these  
68 outcomes. However, long-term survivorship is characterized by the presence of and  
69 elevated risk for comorbidities [4, 5] not simply explained by the decline in AIDS-related  
70 morality and longer life [2,3,6]. Research has linked HIV infection to conditions including  
71 cardiovascular disease [7-10]. After adjusting for usual risk factors, HIV-associated rates  
72 remain the highest for PLWH who are younger, indicating accelerated aging. In fact, a  
73 recent study concluded that the HIV virus has the potential to accelerate aging by more than  
74 14 years [11]. Therefore, aging with HIV must be further explored. The determinants of  
75 aging with HIV include complex interactions of comorbid factors including  
76 biological/clinical (e.g., diabetes) and socio-behavioral (e.g., smoking). With half of the 1.1  
77 million PLWH, in the US estimated to be 50 or over [7,13], understanding and improving  
78 aging of PLWH is a priority.

79  
80           Aging phenotype development has improved the understanding of physical and cognitive  
81 decline in populations of aging adults with multiple comorbidities [16]. Several positive aging  
82 phenotypes are characterized (e.g., physical and social functioning) to allow investigators to  
83 study avenues for healthier aging outcomes [17]. Although a frailty phenotype is proposed in  
84 middle aged HIV infected women, the application of phenotypes to HIV infection is  
85 understudied. More effective HIV interventions in aging are dependent on identifying narrower  
86 phenotypes with greater clinical validity [17]. However, barriers exist to understanding the  
87 interplay between HIV and aging. These are attributed to difficulties in comparing HIV

88 subgroups to the general population of HIV uninfected adults. With this limited understanding of  
89 the link between aging in PLWH and uninfected groups [18,19], the current study seeks to fill  
90 this gap. Moreover, the recent widespread adoption of electronic health records (EHR) in the US  
91 has afforded us the opportunity to leverage clinical data to further HIV phenotype development.

92

93 Utilizing EHR data, we investigated the contributions to medical resource utilization  
94 based on differences in Charlson comorbidity scores. We sought to understand and classify  
95 between group differences in electronic clinical data of HIV infected and uninfected controls,  
96 propensity score matched on gender and age. Our cross-sectional study looked at the presence of  
97 comorbidities and not HIV-related contributions (e.g., disease stage and immune status) to the  
98 development or proliferation of comorbidities. Higher Charlson scores are an indication of the  
99 increased likelihood the predicted outcome will result in either 1-year mortality or the higher use  
100 of medical resources, [20] the current study focused on the later. In this paper, we report the  
101 Individual Characteristics, High Risk Behaviors, Chronic Conditions, Mental Health Conditions  
102 and Infections that predict high Charlson scores by HIV status. Findings will enhance our  
103 understanding of aging with HIV for effective disease management and improved outcomes in  
104 HIV infected populations.

105

## 106 **Materials and Methods**

### 107 **Patient Population**

108 HIV infected (N=208) and uninfected (N=208) inpatient records were matched based  
109 on age and gender for adults 18 and older between January of 2006 and December of 2014,  
110 from a clinical data warehouse of electronic health records (EHR). Institutional review board

111 approval was obtained to analyze the de-identified data, which excluded all potentially  
112 identifiable patient information (e.g., name, address, date of birth). No patients were involved in  
113 the data analysis or interpretation. After data cleaning, we were left with a total of 16,334: HIV  
114 infected (N=208) and uninfected (N=19,216) patients for matching. Mahalanobis' propensity  
115 scoring was used to match HIV infected patients to comparable HIV uninfected patients [17].  
116 Matching allows for meaningful comparisons between two groups and reduces confounding  
117 factors in the statistical assessment of outcomes. Diagnostic codes utilized in our analysis were  
118 extracted from encounters, past histories, and problem lists. Factors were identified as  
119 Individual Characteristics (e.g., ICD 9/10: 262 - Malnutrition), High Risk Behaviors (e.g.,  
120 ICD9/10: 305.1 – use of Tobacco), Chronic Conditions (e.g., ICD9/10: 584.9 - Acute Kidney  
121 Failure), Mental Health Conditions (e.g., ICD9/10: 311- Depressive Disorders), and Infections  
122 (e.g., ICD9/10: 070.41- Hepatitis C). Group inclusion was based on the presence or absence of a  
123 diagnosis in the chart history.

124

## 125 **Statistical Analysis**

126 The association between Charlson scores and Individual Characteristics, High Risk  
127 Behaviors, Chronic and, Mental Health Conditions and Infections were examined. Findings are  
128 summarized using descriptive statistics. Pearson Product Moment Correlations (PPMCs) were  
129 calculated to determine the relationship between variables that comprise identified factors and  
130 Charlson scores (an indicator of medical resource utilization). T-tests were used to assess  
131 differences in continuous variables and chi square analyses were used to assess differences in  
132 categorical variables. Two independent stepwise multiple regressions (i.e., HIV+ and HIV-) were  
133 performed to identify the relevant importance of identified variables ( $p < 0.05$ ) to high Charlson

134 scores. The stepwise approach allows for the prevention of bias in the selection of variables in  
135 the final models [21, 22]. Betas ( $\beta$ ) and confidence intervals (CIs) were reported for regression  
136 analyses, with the use of SPSS 23.0.

137

## 138 **Results**

139 A total of 416 patients were included in our analysis, ages 18 to 85, with the mean age  
140 of  $50.6 \pm 13.2$ . The racial distribution of the HIV infected sample (N=208) includes 27.1% (N=56)  
141 Blacks; 21.4% (N=45) Whites; 0.64% (N=1) Asian; 14.3% (N=30) Mixed Race; 12.46% (N=26)  
142 Other; and 24.1% (N=50) Unknown or Declined. The HIV uninfected sample (N=208) includes  
143 10.1% (N=21) Blacks; 31.3% (N=65) Whites; 3.1% (N=6) Asian; 15.4% (N=32) Mixed race; 10.8%  
144 (N=22) Other; and 29.3% (N=61) Unknown or Declined. The frequency of patient admissions was  
145  $7.57 \pm 10.7$  for HIV patients and  $6.17 \pm 8.4$  for HIV uninfected patients. The average length of stay  
146 for HIV patients was  $86.6 \pm 159.5$  and  $63.4 \pm 105$  for HIV uninfected patients. The top four  
147 ICD9/10 codes for the HIV patients were Substance Abuse, Hypertension, Hyperlipidemia and  
148 Hepatitis C whereas, the top four for HIV uninfected patients were Hypertension, Diabetes  
149 Mellitus II, history of tobacco use and Substance abuse, Table 1. Charlson scores ranged from  
150 0-21 with an average of  $7.42 \pm 4.35$  for HIV patients and 0-12 with an average of  $3.52 \pm 2.97$  for  
151 HIV uninfected patients, Table 2.

152

153

154

155

Table 1. Rank (in degrees) of Factors That Contribute to Medical  
Resource Utilization (Charlson Scores) Based on HIV Status

---

|                                          | HIV+<br>N=208 | HIV-<br>N=208 |
|------------------------------------------|---------------|---------------|
| <b><i>Individual Characteristics</i></b> |               |               |
| Noncompliance medical treatment/regimen  | 7°            | 15°           |
| severe protein-calorie malnutrition      | 8°            | 11°           |
| <b><i>High Risk Behaviors</i></b>        |               |               |
| Substance Abuse                          | 1°            | 5°            |
| Current Tobacco Use                      | 8°            | 8°            |
| History of Tobacco Use                   | 7°            | 4°            |
| <b><i>Chronic Conditions</i></b>         |               |               |
| Acute Kidney Failure                     | 9°            | 5°            |
| Diabetes Mellitus II                     | 3°            | 3°            |
| End Stage Renal Disease                  | 14°           | 14°           |
| Hypertension                             | 2°            | 1°            |
| Hyperlipidemia                           | 4°            | 2°            |
| Atherosclerosis                          | 10°           | 10°           |
| Heart Failure                            | 9°            | 7°            |
| Hyponatremia                             | 13°           | 13°           |
| Anemia                                   | 11°           | 6°            |
| Uncomplicated Asthma                     | 6°            | 12°           |
| <b><i>Mental Health Conditions</i></b>   |               |               |
| Depressive Disorders                     | 12°           | 9°            |
| Suicide and self-inflicted injury        | 15°           | 16°           |
| Intentional self-harm                    | 16°           | 16°           |
| <b><i>Infections</i></b>                 |               |               |
| Hepatitis C                              | 5°            | 17°           |
| Syphilis                                 | 17°           | -             |

156

157 Significant differences were observed from bivariate analyses between HIV infected and  
158 uninfected patients based on Charlson scores. These include the Individual Characteristics of  
159 age ( $t=-3.95$ ;  $df=414$ ), length of stay ( $t=-4.79$ ;  $df=414$ ), and admission frequency ( $t=-$   
160  $4.78$ ;  $df=414$ ). They also include the High Risk Behavior of substance abuse ( $X^2= 49.26$ ;  
161  $df=19$ ); the Chronic Conditions of acute kidney disease ( $X^2= 88.98$ ;  $df=19$ ), diabetes mellitus II  
162 ( $X^2= 55.3$ ;  $df=19$ ) end stage renal disease ( $X^2= 28.31$ ;  $df=19$ ) hypertension ( $X^2= 46.55$ ;  $df=19$ ),  
163 hyperlipidemia ( $X^2= 41.20$ ;  $df=19$ ), heart failure ( $X^2= 32.73$ ;  $df=19$ ), hyponatremia ( $X^2=$   
164  $45.14$ ;  $df=19$ ) and anemia ( $X^2= 30.54$ ;  $df=19$ ). Significant differences also included the  
165 Infections of Hepatitis C ( $X^2= 30$ ;  $df=19$ ) and syphilis ( $X^2= 40.86$ ;  $df=19$ ), Table 2.

166

Table 2. Descriptive Statistics, Correlation, X<sup>2</sup>/ t-test for Medical Resource Utilization (Charlson Scores)

|                                     | HIV+        | HIV-      | Charlson Score |      |        |                          |                            |    |
|-------------------------------------|-------------|-----------|----------------|------|--------|--------------------------|----------------------------|----|
|                                     | (N=208)     | (N=208)   | Correlations   |      |        | X <sup>2</sup> / T-tests |                            |    |
| Charlson Comorbidity Score          | 7.42±2.4.35 | 3.52±2.97 | HIV+           | HIV- |        |                          |                            |    |
| <b>Individual Characteristics</b>   |             |           |                |      |        |                          |                            |    |
| Gender                              |             |           |                |      |        |                          |                            |    |
| Male                                | 135         | 135       |                |      |        |                          |                            |    |
| Female                              | 73          | 73        |                |      |        |                          |                            |    |
| Age                                 | 50.6±13.2   | 50.6±13.2 | 0.354          | **   | 0.515  | **                       | -3.95; df=414              | ** |
| Length of Stay                      | 86.6±159.5  | 63.4±105  | 0.292          | **   | 0.283  | **                       | -4.79; df=414 <sup>a</sup> | ** |
| Admissions Frequency                | 7.57±10.7   | 6.17±8.4  | 0.374          | **   | 0.248  | **                       | -4.78; df=414 <sup>a</sup> | ** |
| Noncompliance med treatment/regimen | 27          | 6         | 0.025          |      | -0.059 |                          | 25; df=19                  |    |
| severe protein-calorie malnutrition | 25          | 16        | 0.033          |      | 0.071  |                          | 16.27; df=19               |    |
| <b>High Risk Behaviors</b>          |             |           |                |      |        |                          |                            |    |
| Substance Abuse                     | 82          | 26        | 0.092          |      | -0.042 |                          | 49.26; df=19               | ** |
| Current Tobacco Use                 | 25          | 20        | 0.009          |      | 0.003  |                          | 24.84; df=19               |    |
| History of Tobacco Use              | 27          | 38        | 0.088          |      | 0.005  |                          | 24.8; df=19                |    |
| <b>Chronic Conditions</b>           |             |           |                |      |        |                          |                            |    |
| Acute Kidney Failure                | 24          | 26        | 0.384          | **   | 0.386  | **                       | 88.98; df=19               | ** |
| Diabetes Mellitus II                | 37          | 44        | 0.167          | *    | 0.295  | **                       | 55.3; df=19                | ** |
| End Stage Renal Disease             | 10          | 10        | 0.139          | *    | 0.143  | *                        | 28.31; df=19               | ** |
| Hypertension                        | 49          | 91        | -0.054         |      | 0.045  |                          | 46.55; df=19               | *  |
| Hyperlipidemia                      | 34          | 61        | -0.004         |      | 0.162  | *                        | 41.2; df=19                | ** |
| Atherosclerosis                     | 22          | 18        | 0.104          |      | 0.073  |                          | 25.92; df=19               |    |
| Heart Failure                       | 24          | 22        | 0.048          |      | 0.262  | **                       | 32.73; df=19               | *  |
| Hyponatremia                        | 11          | 12        | 0.071          |      | 0.082  |                          | 45.14; df=19               | ** |
| Anemia                              | 19          | 25        | 0.046          |      | 0.01   |                          | 30.54; df=19               | *  |
| Uncomplicated Asthma                | 28          | 15        | -0.064         |      | -0.036 |                          | 15.37; df=19               |    |
| <b>Mental Health Conditions</b>     |             |           |                |      |        |                          |                            |    |
| Depressive Disorders                | 18          | 19        | 0.061          |      | -0.157 | *                        | 20.28; df=19               |    |
| Suicide and self-inflicted injury   | 5           | 5         | 0.079          |      | 0.025  |                          | 19.88; df=19               |    |
| Intentional self-harm               | 3           | 5         | -0.03          |      | -0.006 |                          | 7; df=19                   |    |
| <b>Infections</b>                   |             |           |                |      |        |                          |                            |    |
| Hepatitis C                         | 32          | 2         | 0.033          |      |        |                          | 30; df=19                  | *  |
| Syphilis                            | 2           | 0         | 0.047          |      |        |                          | 40.86; df=19               | ** |

<sup>a</sup> Equal variances not assumed ; \*\*p < .01, \*p < .05 for t-tests and chi square tests

167

168

169

170

Significant differences were also observed for bivariate analyses among HIV infected and



171 uninfected patients based on age groups: under 50 years of age (<50) and 50 years of age and  
 172 older ( $\geq 50$ ). For both patient populations, these include the Health Risk Behavior of Substance  
 173 Abuse: HIV ( $X^2=6.8$ ;  $df=1$ ) uninfected ( $X^2= 5.65$ ;  $df=1$ ) and the Chronic Conditions of  
 174 Hypertension: HIV ( $X^2=9.66$ ;  $df=1$ ) uninfected ( $X^2= 9.28$ ;  $df=1$ ), Hyperlipidemia: HIV  
 175 ( $X^2=11.25$ ;  $df=1$ ) uninfected ( $X^2= 15.17$ ;  $df=1$ ) and Atherosclerosis: HIV ( $X^2=6.35$ ;  $df=1$ )  
 176 uninfected ( $X^2= 3.71$ ;  $df=1$ ). Additionally, HIV patients included the Mental Health Condition of  
 177 Intentional self-harm ( $X^2=3.91$ ;  $df=1$ ) and the Infection of Hepatitis C ( $X^2=3.75$ ;  $df=1$ ).  
 178 Significant differences in Charlson scores were observed for uninfected patients ( $X^2=7.28$ ;  $df=1$ )  
 179 in addition to the Chronic Condition of Uncomplicated Asthma ( $X^2=5.75$ ;  $df=1$ ) and the Mental  
 180 Health Condition of Depression ( $X^2=7.61$ ;  $df=1$ ), Table 3.

181

Table 3. Age Differences of Factors that Contribute to Medical Resource Utilization (Charlson Scores)

|                                   | HIV+<br><50 and $\geq 50$ |                  | HIV-<br><50 and $\geq 50$ |                  |                  |
|-----------------------------------|---------------------------|------------------|---------------------------|------------------|------------------|
| Mean Charlson Scores              | $\bar{x} = 6.23$          | $\bar{x} = 8.34$ |                           | $\bar{x} = 2.48$ | $\bar{x} = 4.32$ |
| <b>Individual Characteristics</b> |                           |                  |                           |                  |                  |
| Charlson Score                    | -                         |                  |                           | 7.28, $df = 1$   | **               |
| <b>High Risk Behaviors</b>        |                           |                  |                           |                  |                  |
| Substance Abuse                   | 6.8, $df=1$               |                  | **                        | 5.65, $df = 1$   | *                |
| <b>Chronic Conditions</b>         |                           |                  |                           |                  |                  |
| Diabetes Mellitus II              | 11.28, $df=1$             |                  | **                        | -                | **               |
| Hypertension                      | 9.66, $df=1$              |                  | **                        | 9.28, $df=1$     | **               |
| Hyperlipidemia                    | 11.25, $df=1$             |                  | **                        | 15.17, $df=1$    | **               |
| Atherosclerosis                   | 6.35, $df=1$              |                  | *                         | 3.71, $df=1$     |                  |
| Uncomplicated Asthma              | -                         |                  |                           | 5.75, $df=1$     | **               |
| <b>Mental Health Conditions</b>   |                           |                  |                           |                  |                  |
| Depressive Disorders              | -                         |                  |                           | 7.61, $df=1$     | **               |
| Intentional self-harm             | 3.91, $df=1$              |                  | *                         | -                |                  |
| <b>Infections</b>                 |                           |                  |                           |                  |                  |
| Hepatitis C                       | 3.75, $df=1$              |                  | *                         | -                |                  |

\*\*p < .01, \*p < .05

182

183 The stepwise multiple regression for the HIV uninfected patients identified the

184 individual characteristics of age ( $\beta=0.110$ ; [95% CI 0.087, 0.133]) and length of hospital stay  
 185 ( $\beta=0.006$ ; [95% CI 0.003, 0.009]) in addition to the Chronic Conditions of acute kidney failure  
 186 ( $\beta=1.556$ ; [95% CI 0.611, 2.50]), heart failure ( $\beta= 1.713$ ; [95% CI 0.717, 2.71]), and diabetes  
 187 mellitus II ( $\beta= 1.385$ ; [95% CI 0.634, 2.14]), as the most important contributors ( $p<0.05$ )  
 188 associated with high Charlson scores, Table 4.  
 189

Table 4. Linear Regression Model of Best Fit for Medical Resource Utilization (Charlson Scores) (N=416)

| HIV+ Model (N=208)                       |                             |    |                                 |
|------------------------------------------|-----------------------------|----|---------------------------------|
|                                          | Unstandardized Coefficients |    | 95.0% Confidence Interval for B |
|                                          | Beta                        |    |                                 |
| <b><i>Individual Characteristics</i></b> |                             |    |                                 |
| Age                                      | 0.116                       | ** | 0.077 – 0.155                   |
| Admission Frequency                      | 0.159                       | ** | 0.114 – 0.205                   |
| <b><i>Chronic Conditions</i></b>         |                             |    |                                 |
| Acute Kidney Failure                     | 3.27                        | ** | 1.76 – 4.78                     |
| Hypertension                             | -1.77                       | *  | -2.99, -0.551                   |
| Diabetes Mellitus II                     | 1.48                        | *  | 0.107 – 2.85                    |
| HIV- Model (N=208)                       |                             |    |                                 |
| <b><i>Individual Characteristics</i></b> |                             |    |                                 |
| Age                                      | 0.110                       | ** | 0.087 - 0.133                   |
| Length of Stay                           | 0.006                       | ** | 0.003 - 0.009                   |
| <b><i>Chronic Conditions</i></b>         |                             |    |                                 |
| Acute Kidney Failure                     | 1.556                       | ** | 0.611 - 2.50                    |
| Heart Failure                            | 1.713                       | *  | 0.717 - 2.71                    |
| Diabetes Mellitus II                     | 1.385                       | *  | 0.634 - 2.14                    |

\*\*p < .01, \*p < .05

190  
 191  
 192 The stepwise multiple regression for the HIV patients identified the individual  
 193 characteristics of age ( $\beta=0.116$ ; [95% CI 0.077, 0.155]) and admission frequency ( $\beta=0.159$ ;  
 194 [95% CI 0.114, 0.205]) in addition to the chronic conditions of acute kidney failure ( $\beta=3.27$ ;

195 [95% CI 1.76, 4.78]), hypertension ( $\beta = -1.77$ ; [95% CI -2.99, -0.551]), and diabetes mellitus II  
196 ( $\beta = 1.48$ ; [95% CI 0.107, 2.85]), as the most important contributors associated with ( $p < 0.05$ )  
197 high Charlson scores, Table 4.

198

## 199 **Discussion**

200         The National HIV/AIDS Strategy identified the pressing need to facilitate successful  
201 aging of PLWH [5]. As those with long-standing HIV infection age, comorbidities are becoming  
202 increasingly common [16, 24]. To support successful aging, it is essential to improve our  
203 understanding of the contribution of HIV infection to the presence of comorbidities and  
204 associated clinical outcomes. To explore this further, we utilized a clinical dataset of HIV  
205 infected and uninfected patients, matched on age and gender. We sought to identify significant  
206 population-specific differences and their contributions to medical resource utilization, informed  
207 by Charlson scores. Charlson comorbidity scores are robust predictors of mortality and medical  
208 resource utilization, [21] and an important confounding factor, essential to effective  
209 epidemiological investigations of aging and survival [6, 26]. Yet, studies utilizing Charlson  
210 scores as indicators of medical resource utilization in populations of PLWH, are sparse. Our  
211 results identified significant differences between our HIV infected and uninfected patients. Our  
212 predictive models allowed us to observe the interplay of Individual Characteristics, High Risk  
213 Behaviors, Chronic Conditions, Mental Health Conditions and Infections by HIV status.

214

215         Our regression models identified age as a high-level significant contributor to high  
216 Charlson scores in both patient populations. In HIV uninfected patients, age was the most  
217 important contributor, accounting for 50% of the model. In the HIV population, age is the second

218 highest level contributor accounting for almost 36% of the HIV model. This indicates that unlike  
219 normal aging, other factors increase the utilization of medical resources for patients with HIV.  
220 Although our populations were matched on age, the average Charlson score was three points  
221 higher for HIV, reinforcing that the additional contributors are potential indicators of accelerated  
222 aging. Additionally, our bivariate analyses of age differences identified significant within group  
223 differences in Charlson scores for the uninfected patients, but not for the HIV patients. Similar  
224 aging-related medical resource utilization was observed in younger and older PLWH, potential  
225 evidence of accelerated aging.

226

227 Admissions frequency in HIV patients was a top predictor of high Charlson score in our  
228 regression model. In populations of PLWH, admissions type, whether urgent or non-urgent, the  
229 number of secondary diagnoses, and number of procedures, are significant contributors of  
230 medical resource utilization and significant in our model [26]. The most severe clinical  
231 conditions are often categorized by multiple diagnoses and procedures, contributing directly to  
232 length of stay; seen as a top contributor to high Charlson scores in our uninfected model [26].  
233 Understandably, the cost of hospitalizations is a major financial burden on the US healthcare  
234 system; with HIV-related hospitalizations including the more expensive diagnostic categories  
235 [26]. Although length of stay was not significant in our HIV model, our results revealed HIV  
236 patients' average length of stay was 87 patient days, which are 23 days more than uninfected  
237 patients. Studies have also observed that in populations of PLWH with no comorbidities, a 60%  
238 increase in length of stay and 70% increase in medical resource utilization remain, compared to  
239 uninfected groups [26].

240 Acute kidney failure in HIV infected and uninfected patient models as well as end stage  
241 renal disease in the HIV model were top predictors of high Charlson scores. HIV nephropathy  
242 has decreased with the use of anti-retroviral therapy. Yet, in populations of PLWH, compared to  
243 uninfected peer groups, risk factors for kidney disease were present in our models including  
244 diabetes for HIV uninfected patients and hypertension for HIV patients [23]. Other studies have  
245 also revealed that kidney-related comorbidities are associated with extremely high medical-  
246 related costs, as indicated in both our models as top contributors to high Charlson scores [27].

247  
248 HIV patients are recognized to be at high risk for cardiovascular-related illness, with  
249 heart disease being a very common complication [23]. Interestingly, both models included  
250 cardiovascular related illnesses: hypertension (HIV+) and heart failure (HIV-) were top  
251 significant contributors in both groups [23]. Higher rates of hypertension are observed in PLWH  
252 in addition to associated illnesses [28, 29]. PLWH also have increased risk for cardiovascular-  
253 related mortality compared to uninfected groups. In fact, a study showed the risk of  
254 cardiovascular-related mortality increased steadily from 1999 to 2013 as the risk decreased  
255 among HIV uninfected people. Heart failure risk is also observed among PLWH with depression  
256 and hypertension [30]. Although not significant in our model, more heart failure existed in the  
257 HIV patients with hypertension, yet not the case for depression. Heart failure is also related to  
258 Diabetes Mellitus II and both diseases were present only in the HIV uninfected model.  
259 Understanding that some HIV medications increase the risk of type II Diabetes in PLWH in  
260 addition to the regular risk factors, it was surprising it did not contribute to high medical resource  
261 utilization as with our uninfected population [31, 32].

262

## 263 **Limitations**

264           Our cross-sectional study explored the top diagnoses and procedure codes. Future studies  
265 on predictive modeling should explore additional clinical factors and apply other analytic  
266 approaches to support a comprehensive evaluation of medical resource utilization for effective  
267 integrated health services delivery. We did not match our sample on other factors including  
268 socioeconomic status, due to incomplete sociodemographics in the patient records. Data that  
269 comprise EHRs is collected during clinical care and not collected for research purposes. Therefore,  
270 incomplete sociodemographics will exist for a variety of indicators including race. Our cross-  
271 sectional analysis was unable to include HIV-related contributions (e.g., immune status) to the  
272 development or severity of comorbidities, only their documented presence or absence. Future  
273 longitudinal studies should account for these additional factors, and track such factors (e.g., immune  
274 status) over time to explore their contributions to comorbidity development and medical resource  
275 utilization.

276  
277           Our analysis also did not include an exploration of the contribution of HIV-related clinical  
278 indicators (CD4, viral load, antiretrovirals); the analysis of HIV-related clinical indicators one point  
279 in time (cross-sectional analysis) would not be informative to the presence and absence of the  
280 observed comorbidities. Future longitudinal studies should analyze HIV-related clinical indicators  
281 over time, as medications, including protease inhibitors, are linked to increase risk of  
282 cardiovascular related illness. This should also be explored in future predictive modeling studies  
283 [23].

284

285

## 286 **Conclusions**

287           As HIV population's age both locally and globally, preventing, identifying and managing  
288 comorbidities is increasingly important. An essential need exists to further understand the causal  
289 factors of identified aging outcomes and in the exploration of additional clinical indicators to  
290 inform optimal treatment, care and self-management. Interventions targeting aging phenotypes,  
291 specific to HIV, have been sparse. Additional contributions to the development of such  
292 phenotypes, were found in our study and critical as PLWH age. Similarities and differences were  
293 observed between our age and gender matched patients and factor-specific contributions in  
294 higher medical resource utilization observed. Our findings add to the literature on HIV and  
295 aging-related outcomes and support HIV and aging phenotype development.

296

### 297 **List of Abbreviations**

298 PLWH: People Living with HIV/AIDS

299 PPMC: Pearson Product Moment Correlations

300 CI: Confidence Intervals

301

## 302 **Acknowledgements**

303           This work was supported by Columbia University's Office of the Vice Provost for  
304 Diversity and Inclusion

305

### 306 **Authors Contributions**

307           Authors assisted in the data interpretation (MO, SY), manuscript drafting (MO),  
308 revising intellectual content (MO, SY). This manuscript has not been published and is not  
309 under consideration for publication elsewhere.

310

311

312 **Competing interests**

313 We have no conflict of interest to disclose.

314

315 **References**

316

317 1. Avelino-Silva VI, Ho YL, Avelino-Silva TJ, Santos Sde S. Aging and HIV infection.  
318 Ageing Res Rev. 2011;10(1):163-72. PMID: 20974294. doi: 10.1016/j.arr.2010.10.004.

319

320 2. High KP, Brennan-Ing M, Clifford DB, Cohen MH, Currier J, Deeks SG, et al.  
321 HIV and aging: state of knowledge and areas of critical need for research. A report to  
322 the NIH Office of AIDS Research by the HIV and Aging Working Group. J Acquir  
323 Immune Defic Syndr. 2012;60 Suppl 1: S1-18. PMID: 22688010 PMCID: PMC3413877  
324 DOI:10.1097/QAI.0b013e31825a3668.

325

326 3. Cardoso SW, Torres TS, Santini-Oliveira M, Marins LM, Veloso VG, Grinsztejn B.  
327 Aging with HIV: a practical review. Braz J Infect Dis. 2013;17(4):464-79. PMID:  
328 23711587; DOI: 10.1016/j.bjid.2012.11.007

329

330 4. Vance DE, McGuinness T, Musgrove K, Orel NA, Fazeli PL. Successful aging  
331 and the epidemiology of HIV. Clin Interv Aging. 2011; 6:181-92. PMID: 21822373  
332 PMCID: PMC3147048 DOI: 10.2147/CIA.S14726

333

334 5. Vance DE, Mugavero M, Willig J, Raper JL, Saag MS. Aging with HIV: a  
335 cross-sectional study of comorbidity prevalence and clinical characteristics a cross  
336 decades of life. J Assoc Nurses AIDS Care. 2011;22(1):17-25. PMID: 20471864 DOI:  
337 10.1016/j.jana.2010.04.002

338

339 6. Meir-Shafir K, Pollack S. Accelerated Aging in HIV Patients. Rambam Maimonides Med  
340 J. 2012;3(4): e0025. PMID: 23908849 PMCID: PMC3678823 DOI: 10.5041/RMMJ.10089

341

342 7. David E Vancet HB, Miljam-Collette Kempf, Norman L Keltner, Fazeli  
343 PL. Aging, HIV and wellness: augmenting the components of successful aging. Aging  
344 Health. 2011;7(3):435-46. DOI: doi.org/10.2217/ahe.11.28

345

346 8. Evidence is mounting that HIV infection accelerates aging process. Clinicians need to  
347 emphasize wellness. AIDS Alert. 2011;26(3):25-7. PMID: 21539036

348

349 9. Justice A, Falutz J. Aging and HIV: an evolving understanding. Curr Opin HIV/AIDS.  
350 2014;9(4):291-3. PMID: 24871091 PMCID: PMC4507814 DOI:  
351 10.1097/COH.0000000000000081

352

353 10. Watt N, Sigfrid L, Legido-Quigley H, Hogarth S, Maimaris W, Otero-García L, et al.  
354 Health systems facilitators and barriers to the integration of HIV and chronic disease  
355 services: a systematic review. Health Policy Plan. 2017 Nov 1;32(suppl\_4):iv13-iv26.  
356 PMID: 28666336 PMCID: PMC5886067 DOI: 10.1093/heapol/czw149.



- 357  
358 11. Rickabaugh TM, Baxter RM, Sehl M, Sinsheimer JS, Hultin PM, Hultin LE, et  
359 al. Acceleration of age- associated methylation patterns in HIV- I-infected adults. PLoS  
360 One. 2015;10(3): e011 9201. PMID: 25807146 PMCID: PMC4373843 DOI:  
361 10.1371/journal.pone.0119201  
362  
363 12. Brothers TD, Rockwood K. Biologic aging, frailty, and age-related disease  
364 in chronic HIV infection. *Curr Opin HIV AIDS*. 2014;9(4):412-8. PMID:  
365 24840060 DOI: 10.1097/COH.0000000000000070  
366  
367 13. HIV Surveillance Annual Report, 2013. New York City Department of Health and  
368 Mental Hygiene, 2014.  
369  
370 14. Holtgrave DR. Development of year 2020 goals for the National HIV/AIDS  
371 Strategy for the United States. *AIDS Behav*. 2014;18(4):638-43. PMID:  
372 23934340 DOI: 10.1007/s10461-013-0579-9  
373  
374 15. Chambers LA, Wilson MG, Rueda S, Gogolishvili D, Shi MQ, Rourke SB, et al.  
375 Evidence informing the intersection of HIV, aging and health: a scoping review. *AIDS*  
376 *Behav*. 2014;18(4):661-75. PMID: 24185708 DOI: 10.1007/s10461-013-0627-5  
377  
378 16. Stoff DM, Goodkin K, Jeste D, Marquine M. Redefining Aging in HIV  
379 Infection Using Phenotypes. *Curr HIV/AIDS Rep*. 2017;14(5): 184-99. PMID: 28933001  
380 PMCID: PMC5614907 DOI: 10.1007/s11904-017-0364-x  
381  
382 17. Baltar VT, Sousa CA, Westphal MF. Mahalanobis' distance and propensity score to construct a  
383 controlled matched group in a Brazilian study of health promotion and social determinants. *Revista*  
384 *Brasileira de Epidemiologia*. 2014;17(3):668-79. doi: 10.1590/1809-4503201400030008.  
385  
386 18. Blackburn EH. Telomerase and Cancer: Kirk A. Landon--AACR prize for basic  
387 cancer research lecture. *Mo! Cancer Res*. 2005;3(9):477-82. PMID: 16179494 DOI:  
388 10.1158/1541-7786.MCR-05-0147  
389  
390 19. D'Souza G, Carey TE, William WN, Jr., Nguyen ML, Ko EC, Riddell Jt, et al.  
391 Epidemiology of head and neck squamous cell cancer among HIV-infected patients.  
392 *J Acquir Immune Defic Syndr*. 2014;65(5):603-10. PMID: 24326607 PMCID:  
393 PMC3999230 DOI: 10.1097/QAI.0000000000000083  
394  
395 20. Yoon SJ, Kim EJ, Seo HJ, Oh IH. The Association between Charlson  
396 Comorbidity Index and the Medical Care Cost of Cancer: A Retrospective Study.  
397 *Biomed Res Int*. 2015;2015:259341. PMID: 26347086 PMCID: PMC4539424 DOI:  
398 10.1155/2015/259341  
399  
400 21. Rodriguez AM, Mayo NE, Gagnon B. Independent contributors to overall quality of  
401 life in people with advanced cancer. *Br J Cancer*. 2013;108(9): 1790-800. PMID:  
402 23591199 PMCID: PMC3663579 DOI: 10.1038/bjc.2013.146  
403

- 404 22. Schildcrout JS, Basford MA, Pulley JM, Masys DR, Roden DM, Wang D, et al. An  
405 analytical approach to characterize morbidity profile dissimilarity between distinct  
406 cohorts using electronic medical records. *J Biomed Inform.* 2010;43(6):914-23.  
407 PMID: 20688191 PMCID: PMC2991387 DOI: 10.1016/j.jbi.2010.07.011  
408
- 409 23. Wing EJ. HIV and aging. *Int J Infect Dis.* 2016;53: 61-8. PMID: 27756678 DOI:  
410 10.1016/j.ijid.2016.10.004  
411
- 412 24. Wallet MA, Buford TW, Joseph AM, Sankuratri M, Leeuwenburgh C, Pahor M,  
413 et al. Increased inflammation but similar physical composition and function in older-  
414 aged, HIV-1 infected subjects. *BMC Immunol.* 2015; 16:43. PMID: 26204934 PMCID:  
415 PMC4513956 DOI: 10.1186/s12865-015-0106-z  
416
- 417 25. Toson B, Harvey LA, Close JC. The ICD-10 Charlson Comorbidity Index predicted  
418 mortality but not resource utilization following hip fracture. *J Clin Epidemiol.*  
419 2015;68(1):44-51. PMID: 25447352 DOI: 10.1016/j.jclinepi.2014.09.017  
420
- 421 26. Dias SS, Martins MFO. HIV AIDS Length of Stay Outliers. *Procedia Computer*  
422 *Science.* 2015; 64:984- 92. DOI: 10.1016/j.procs.2015.08.617  
423
- 424 27. van der Valk M, Reiss P. Noncommunicable Diseases in People Living With HIV:  
425 Time for Integrated Care. *J Infect Dis.* 2017;216(12):1481-3. PMID: 29253145  
426 DOI: 10.1093/infdis/jix525  
427
- 428 28. Gosmanova EO, Lu JL, Streja E, Cushman WC, Kalantar-Zadeh K, Kovesdy CP.  
429 Association of medical treatment nonadherence with all-cause mortality in newly treated  
430 hypertensive US veterans. *Hypertension.* 2014;64(5):951-7. PMID: 25259744  
431 PMCID: PMC4192006 DOI: 10.1161/HYPERTENSIONAHA.114.03805  
432
- 433 29. Schouten J, Wit FW, Stolte IG, Kootstra NA, van der Valk M, Geerlings SE, et al.  
434 Cross-sectional comparison of the prevalence of age-associated comorbidities and  
435 their risk factors between HIV-infected and uninfected individuals: the AGEHIV cohort  
436 study. *Clin Infect Dis.* 2014;59(12): 1787-97. PMID: 25182245 DOI: 10.1093/cid/ciu701  
437
- 438 30. Brown RT, Goodman L, Guzman D, Tieu L, Ponath C, Kushel MB. Pathways to  
439 Homelessness among ' Older Homeless Adults: Results from the HOPE HOME Study.  
440 *PLoS One.* 2016;11(5): e0155065. PMID: 27163478 PMCID: PMC4862628 DOI:  
441 10.1371/journal.pone.0155065  
442
- 443 31. Lopez-Otin C, Blasco MA, Partridge L, Serrano M, Kroemer G. The hallmarks of  
444 aging. *Cell.* 2013;153(6):1194-217. PMID: 23746838 PMCID: PMC3836174 DOI:  
445 10.1016/j.cell.2013.05.039  
446
- 447 32. Yin M. Vitamin D, bone, and HIV infection. *Top Antivir Med.* 2012;20(5):168-72.  
448 PMID: 23363695 PMCID: PMC4019218  
449

450 Table 1. Rank (in degrees) of Factors That Contribute to Medical Resource Utilization  
451 (Charlson Scores) Based on HIV Status

452

453 Table 2. Descriptive Statistics, Correlation,  $X^2$ / t-test for Medical Resource Utilization  
454 (Charlson Scores)

455

456 Table 3. Age Differences of Factors that Contribute to Medical Resource Utilization  
457 (Charlson Scores) Based on HIV Status

458

459 Table 4. Table 4. Linear Regression Model of Best Fit for Medical Resource Utilization  
460 (Charlson Scores) (N=416)

461

462

463

464

465

466

467
